# Supplementary material for: El Niño–Southern Oscillation ( ENSO ) event reduces CO 2 uptake of an Indonesian oil palm plantation
Source: Copernicus journal article supplement (doi:10.5194/bg-2019-49), 2019-02-12
Supplement: Supplementary file 1 [file bg-2019-49-supplement.pdf]

Supplement

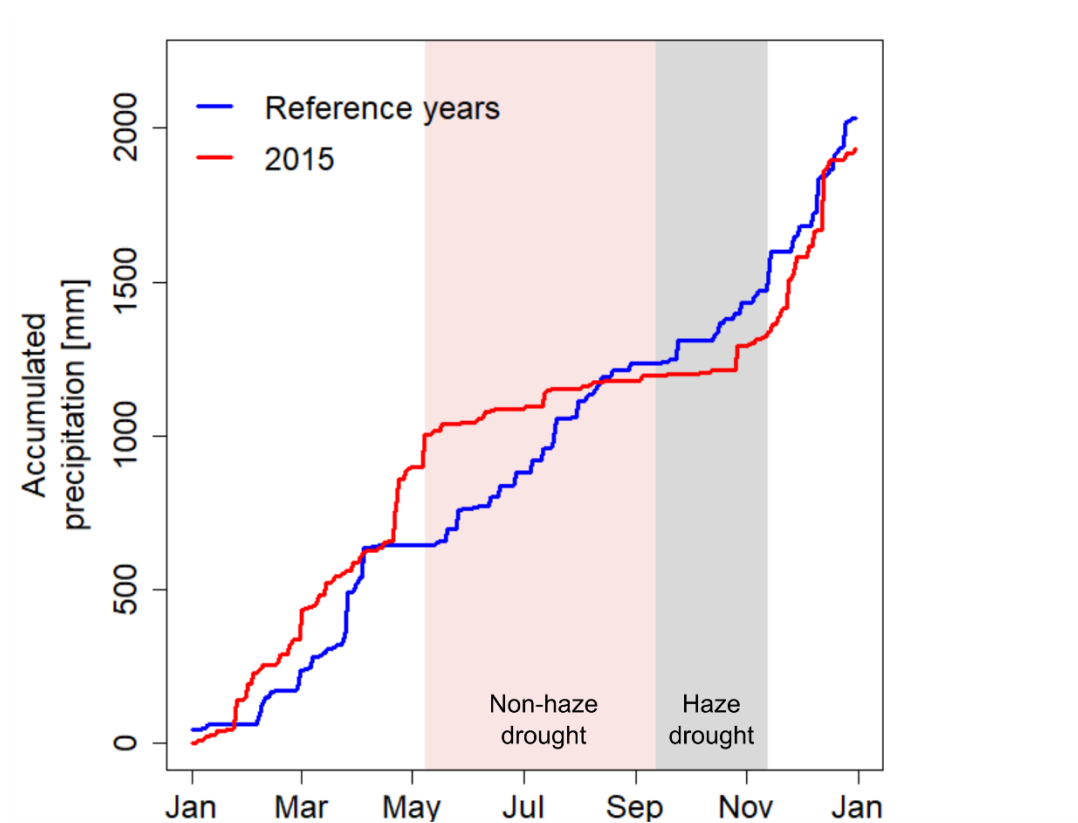

Figure S1: Accumulated precipitation in 2015 and during the reference time period. Shaded areas in red and grey mark the non-haze drought and the haze drought period in 2015, respectively.

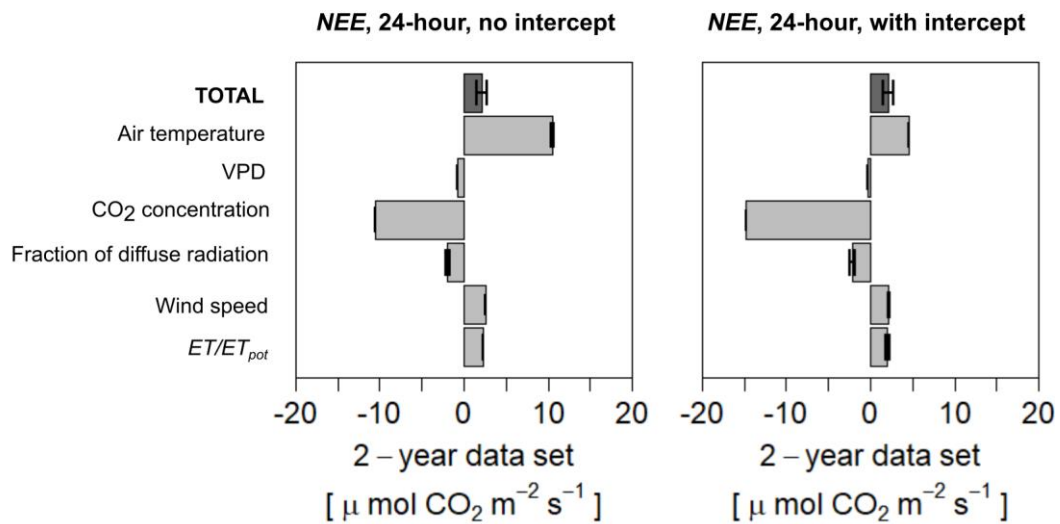

**Figure S2: Comparison of Multiple Linear Regression Model (MLRM) results without (left) and with (right) intercept on 24-hour net ecosystem CO<sub>2</sub> exchange (NEE) during the entire study period (2014-2016). Error bars show the standard error.**

**Table S1: Contribution ( $\pm$  standard error) of meteorological parameters (predictors) on net ecosystem CO<sub>2</sub> exchange (*NEE*) derived from multiple linear regression model (*MLRM*) during different time periods (full 2-year study period, non-haze drought, haze drought, and non-haze & non-drought conditions). Negative values indicate CO<sub>2</sub> uptake for 24-hour *NEE* and midday *NEE*, and CO<sub>2</sub> release for night time *NEE*. If not otherwise stated, measurement height is 22 m above the surface.**

5

| Predictor [ $\mu\text{mol m}^{-2} \text{s}^{-1}$ ], full 2-year study period |                      |                              |                     |                                     |                                  |                              |                            |                        |                      |
|------------------------------------------------------------------------------|----------------------|------------------------------|---------------------|-------------------------------------|----------------------------------|------------------------------|----------------------------|------------------------|----------------------|
|                                                                              | Air<br>temperature   | Air<br>temperature<br>(12 m) | Wind<br>speed       | Fraction of<br>diffuse<br>radiation | CO <sub>2</sub><br>concentration | Vapor<br>pressure<br>deficit | <i>ET/ET<sub>pot</sub></i> | Incoming<br><i>PAR</i> | Total                |
| <b>NEE, 24-hour</b>                                                          | -10.50 ( $\pm$ 0.06) | -                            | -2.61 ( $\pm$ 0.12) | 1.94 ( $\pm$ 0.54)                  | 10.54 ( $\pm$ 0.01)              | 0.73 ( $\pm$ 0.03)           | -2.23 ( $\pm$ 0.44)        | -                      | -2.13 ( $\pm$ 1.18)  |
| <b>NEE, midday (10-14 h)</b>                                                 | -34.48 ( $\pm$ 0.12) | -                            | -                   | 6.86 ( $\pm$ 1.06)                  | 30.30 ( $\pm$ 0.01)              | 6.87 ( $\pm$ 0.06)           | -2.47 ( $\pm$ 1.67)        | -14.68 ( $\pm$ 0.001)  | -21.32 ( $\pm$ 2.93) |
| <b>NEE, night time (19-5:30 h)</b>                                           | 37.70 ( $\pm$ 0.29)  | -28.37 ( $\pm$ 0.30)         | -1.17 ( $\pm$ 0.58) | -                                   | -                                | -0.98 ( $\pm$ 0.10)          | 0.51 ( $\pm$ 0.76)         | -                      | 7.69 ( $\pm$ 2.03)   |
| Predictor [ $\mu\text{mol m}^{-2} \text{s}^{-1}$ ], non-haze drought         |                      |                              |                     |                                     |                                  |                              |                            |                        |                      |
|                                                                              | Air<br>temperature   | Air<br>temperature<br>(12 m) | Wind<br>speed       | Fraction of<br>diffuse<br>radiation | CO <sub>2</sub><br>concentration | Vapor<br>pressure<br>deficit | <i>ET/ET<sub>pot</sub></i> | Incoming<br><i>PAR</i> | Total                |

|                   |                |                |               |               |                     |               |               |                |                      |
|-------------------|----------------|----------------|---------------|---------------|---------------------|---------------|---------------|----------------|----------------------|
| <b>NEE,</b>       | -10.65 ( $\pm$ | -              | -2.96 ( $\pm$ | 1.82 ( $\pm$  | 10.39 ( $\pm$ 0.01) | 0.85 ( $\pm$  | -1.97 ( $\pm$ | -              | -2.51 ( $\pm$ 0.96)  |
| <b>24-hour</b>    | 0.05)          |                | 0.11)         | 0.40)         |                     | 0.02)         | 0.39)         |                |                      |
| <b>NEE,</b>       | -34.40 ( $\pm$ | -              | -             | -5.50 ( $\pm$ | 29.94 ( $\pm$ 0.01) | 7.00 ( $\pm$  | -2.26 ( $\pm$ | -15.96 ( $\pm$ | -21.18 ( $\pm$ 2.26) |
| <b>midday</b>     | 0.10)          |                |               | 0.65)         |                     | 0.04)         | 1.46)         | 0.001)         |                      |
| <b>(10-14 h)</b>  |                |                |               |               |                     |               |               |                |                      |
| <b>NEE, night</b> | 38.48 ( $\pm$  | -28.69 ( $\pm$ | -1.30 ( $\pm$ | -             | -                   | -1.39 ( $\pm$ | 0.51 ( $\pm$  | -              | 7.61 ( $\pm$ 1.45)   |
| <b>time (19-</b>  | 0.32)          | 0.32)          | 0.28)         |               |                     | 0.06)         | 0.47)         |                |                      |
| <b>5:30 h)</b>    |                |                |               |               |                     |               |               |                |                      |

---

**Predictor [ $\mu\text{mol m}^{-2} \text{s}^{-1}$ ], haze drought**

---

|                   | <b>Air</b>         | <b>Air</b>         | <b>Wind</b>   | <b>Fraction of</b> | <b>CO<sub>2</sub></b> | <b>Vapor</b>    | <b><i>ET/ET<sub>pot</sub></i></b> | <b>Incoming</b> | <b>Total</b>         |
|-------------------|--------------------|--------------------|---------------|--------------------|-----------------------|-----------------|-----------------------------------|-----------------|----------------------|
|                   | <b>temperature</b> | <b>temperature</b> | <b>speed</b>  | <b>diffuse</b>     | <b>concentration</b>  | <b>pressure</b> |                                   | <b>PAR</b>      |                      |
|                   |                    | <b>(12 m)</b>      |               | <b>radiation</b>   |                       | <b>deficit</b>  |                                   |                 |                      |
| <b>NEE,</b>       | -10.94 ( $\pm$     | -                  | -2.39         | 2.13 (0.19)        | 10.86 ( $\pm$         | 1.09 ( $\pm$    | -1.96 ( $\pm$                     | -               | -1.20 ( $\pm$ 0.35)  |
| <b>24-hour</b>    | 0.01)              |                    | (0.03)        |                    | 0.001)                | 0.004)          | 0.12)                             |                 |                      |
| <b>NEE,</b>       | -36.09 ( $\pm$     | -                  | -             | -9.39 ( $\pm$      | 30.95 ( $\pm$ 0.01)   | 9.20 ( $\pm$    | -2.10 ( $\pm$                     | -11.49 ( $\pm$  | -18.92 ( $\pm$ 2.24) |
| <b>midday</b>     | 0.10)              |                    |               | 1.13)              |                       | 0.03)           | 0.97)                             | 0.0004)         |                      |
| <b>(10-14 h)</b>  |                    |                    |               |                    |                       |                 |                                   |                 |                      |
| <b>NEE, night</b> | 39.31 ( $\pm$      | -28.44 ( $\pm$     | -1.07 ( $\pm$ | -                  | -                     | -1.87 ( $\pm$   | 0.51 ( $\pm$                      | -               | 8.44 ( $\pm$ 1.11)   |
| <b>time (19-</b>  | 0.23)              | 0.0.25)            | 0.35)         |                    |                       | 0.03)           | 0.24)                             |                 |                      |
| <b>5:30 h)</b>    |                    |                    |               |                    |                       |                 |                                   |                 |                      |

---

**Predictor [ $\mu\text{mol m}^{-2} \text{s}^{-1}$ ], non-drought and non-haze conditions**

---

|                                    | <b>Air</b>         | <b>Air</b>         | <b>Wind</b>    | <b>Fraction of</b> | <b>CO<sub>2</sub></b> | <b>Vapor</b>    | <b>ET/ET<sub>pot</sub></b> | <b>Incoming</b>  | <b>Total</b>    |
|------------------------------------|--------------------|--------------------|----------------|--------------------|-----------------------|-----------------|----------------------------|------------------|-----------------|
|                                    | <b>temperature</b> | <b>temperature</b> | <b>speed</b>   | <b>diffuse</b>     | <b>concentration</b>  | <b>pressure</b> |                            | <b>PAR</b>       |                 |
|                                    |                    | <b>(12 m)</b>      |                | <b>radiation</b>   |                       | <b>deficit</b>  |                            |                  |                 |
| <b>NEE, 24-hour</b>                | -10.38 (± 0.05)    | -                  | -2.55 (± 0.10) | 1.96 (± 0.65)      | 10.57 (± 0.003)       | 0.63 (± 0.04)   | -2.42 (± 0.34)             | -                | -2.19 (± 1.19)  |
| <b>NEE, midday (10-14 h)</b>       | -34.26 (± 0.12)    | -                  | -              | -6.91 (± 1.33)     | 30.33 (± 0.01)        | 6.46 (± 0.08)   | -2.65 (± 1.67)             | -14.76 (± 0.001) | -21.78 (± 3.21) |
| <b>NEE, night time (19-5:30 h)</b> | 37.19 (± 0.31)     | -28.25 (± 0.31)    | -1.14 (± 0.69) | -                  | -                     | -0.71 (± 0.20)  | 0.51 (± 0.86)              | -                | 7.60 (± 2.36)   |

**Table S2: Multiple Linear Regression Model (MLRM): Statistics of midday (10-14 h local time), night time (19-5:30 h) and 24-hour averaged environmental parameters. If not otherwise stated, measurement height is 22 meter above the surface.**

| <b>Parameter (midday)</b>     | <b>Estimate</b> | <b>SE</b> | <b>t-value</b> | <b>P-value</b> |
|-------------------------------|-----------------|-----------|----------------|----------------|
| Incoming PAR                  | -0.01           | 0.00      | -12.44         | <0.001         |
| Air temperature               | -1.15           | 0.14      | -8.50          | <0.001         |
| Vapor pressure deficit        | 0.56            | 0.07      | 7.98           | <0.001         |
| CO <sub>2</sub> concentration | 0.08            | 0.01      | 9.09           | <0.001         |
| Fraction of diffuse radiation | -9.98           | 1.20      | -8.29          | <0.001         |
| <i>ET/ET<sub>pot</sub></i>    | -5.58           | 1.90      | -2.94          | <0.001         |
| <b>Parameter (night time)</b> | <b>Estimate</b> | <b>SE</b> | <b>t-value</b> | <b>P-value</b> |
| Air temperature               | 1.50            | 0.17      | 8.68           | <0.001         |
| Vapor pressure deficit        | -0.35           | 0.06      | -6.07          | <0.001         |
| <i>ET/ET<sub>pot</sub></i>    | 1.65            | 0.45      | 3.67           | <0.001         |
| Air temperature (12 m)        | -1.14           | 0.17      | -6.52          | <0.001         |
| Wind speed                    | -0.88           | 0.34      | -2.59          | <0.01          |
| <b>Parameter (24-hour)</b>    | <b>Estimate</b> | <b>SE</b> | <b>t-value</b> | <b>P-value</b> |
| Vapor pressure deficit        | 0.12            | 0.06      | 2.11           | 0.04           |
| CO <sub>2</sub> concentration | 0.03            | 0.01      | 2.80           | 0.01           |
| Fraction of diffuse radiation | 2.18            | 1.22      | 1.79           | 0.08           |
| Wind speed                    | -1.70           | 0.27      | -6.31          | <0.001         |
| Air temperature               | -0.39           | 0.12      | -3.15          | <0.001         |
| <i>ET/ET<sub>pot</sub></i>    | -4.33           | 0.99      | -4.39          | <0.001         |

**Table S3: Multiple Linear Regression Model (MLRM): Correlations of midday (10-14 h local time), night time (19-5:30 h) and 24-hour averaged environmental parameters. If not otherwise stated, measurement height is 22 meter above the surface.**

| <b>Midday</b>                 | Incoming<br>PAR    | Air<br>temperature        | Vapor pressure<br>deficit | CO <sub>2</sub> concentration | Fraction of<br>diffuse radiation | <i>ET/ET<sub>pot</sub></i> |
|-------------------------------|--------------------|---------------------------|---------------------------|-------------------------------|----------------------------------|----------------------------|
| Incoming PAR                  | 1.00               | 0.55                      | 0.56                      | -0.42                         | -0.82                            | -0.28                      |
| Air temperature               | 0.55               | 1.00                      | 0.89                      | -0.22                         | -0.33                            | -0.52                      |
| Vapor pressure deficit        | 0.56               | 0.89                      | 1.00                      | -0.18                         | -0.30                            | -0.53                      |
| CO <sub>2</sub> concentration | -0.42              | -0.22                     | -0.18                     | 1.00                          | 0.33                             | 0.14                       |
| Fraction of diffuse radiation | -0.82              | -0.33                     | -0.30                     | 0.33                          | 1.00                             | 0.16                       |
| <i>ET/ET<sub>pot</sub></i>    | -0.28              | -0.52                     | -0.53                     | 0.14                          | 0.16                             | 1.00                       |
| <b>Night time</b>             | Air<br>temperature | Vapor pressure<br>deficit | Air<br>temperature (12 m) | Wind<br>speed                 | <i>ET/ET<sub>pot</sub></i>       |                            |
| Air temperature               | 1.00               | 0.71                      | 0.76                      | 0                             | -0.01                            |                            |
| Vapor pressure deficit        | 0.71               | 1.00                      | 0.44                      | 0.24                          | -0.02                            |                            |
| Air temperature (12 m)        | 0.76               | 0.44                      | 1.00                      | 0.04                          | -0.03                            |                            |
| Wind speed                    | 0                  | 0.24                      | 0.04                      | 1.00                          | -0.06                            |                            |
| <i>ET/ET<sub>pot</sub></i>    | -0.01              | -0.02                     | -0.03                     | -0.06                         | 1.00                             |                            |

| <b>24-hour</b>                | Vapor pressure deficit | CO <sub>2</sub> concentration | Fraction of diffuse radiation | Wind speed | Air temperature | <i>ET/ET<sub>pot</sub></i> |
|-------------------------------|------------------------|-------------------------------|-------------------------------|------------|-----------------|----------------------------|
| Vapor pressure deficit        | 1.00                   | 0.05                          | -0.14                         | 0.25       | 0.76            | -0.62                      |
| CO <sub>2</sub> concentration | 0.05                   | 1.00                          | 0.29                          | -0.30      | 0.09            | 0.13                       |
| Fraction of diffuse radiation | -0.14                  | 0.29                          | 1.00                          | -0.22      | -0.19           | 0.25                       |
| Wind speed                    | 0.25                   | -0.30                         | -0.22                         | 1.00       | -0.09           | -0.14                      |
| Air temperature               | 0.76                   | 0.09                          | -0.19                         | -0.09      | 1.00            | -0.69                      |
| <i>ET/ET<sub>pot</sub></i>    | -0.62                  | 0.13                          | 0.25                          | -0.14      | -0.69           | 1.00                       |



**Table S4: Effect of meteorological parameters (predictors,  $\pm$  standard error) on net ecosystem CO<sub>2</sub> exchange (*NEE*) during non-haze drought conditions derived from multiple linear regression model (*MLRM*). Negative values indicate decrease in CO<sub>2</sub> uptake for 24-hour *NEE* and midday *NEE*, and increase in CO<sub>2</sub> release for nighttime *NEE*. If not otherwise stated, measurement height is 22 m above the surface.**

|                                   | Predictor [ $\mu\text{mol m}^{-2} \text{s}^{-1}$ ] |                    |                    |                     |                      |                       |                            |                      |                     |
|-----------------------------------|----------------------------------------------------|--------------------|--------------------|---------------------|----------------------|-----------------------|----------------------------|----------------------|---------------------|
|                                   | Air                                                | Air                | Wind               | Fraction of         | CO <sub>2</sub>      | Vapor                 | <i>ET/ET<sub>pot</sub></i> | Incoming             | Total               |
|                                   | temperature                                        | temperature        | speed              | diffuse             | concentration        | pressure              |                            | <i>PAR</i>           |                     |
|                                   |                                                    | (12 m)             |                    | radiation           |                      | deficit               |                            |                      |                     |
| <b>NEE, 24-hour</b>               | 0.26 ( $\pm$ 0.01)                                 | -                  | 0.41 ( $\pm$ 0.01) | 0.14 ( $\pm$ 0.25)  | 0.18 ( $\pm$ 0.0002) | -0.22 ( $\pm$ 0.02)   | -0.45 ( $\pm$ 0.04)        | -                    | 0.32 ( $\pm$ 0.23)  |
| <b>NEE, midday</b>                | 0.14 ( $\pm$ 0.02)                                 | -                  | -                  | -1.40 ( $\pm$ 0.68) | 0.39 ( $\pm$ 0.001)  | -0.54 ( $\pm$ 0.0003) | -0.39 ( $\pm$ 0.21)        | 1.20 ( $\pm$ 0.0003) | -0.60 ( $\pm$ 0.95) |
| <b>NEE, nighttime (19-5:30 h)</b> | -1.29 ( $\pm$ 0.02)                                | 0.44 ( $\pm$ 0.01) | 0.1 ( $\pm$ 0.41)  | -                   | -                    | 0.68 ( $\pm$ 0.14)    | 0 ( $\pm$ 0.39)            | -                    | -0.02 ( $\pm$ 0.91) |

**Table S5: Effect of meteorological parameters (predictors,  $\pm$  standard error) on net ecosystem CO<sub>2</sub> exchange (*NEE*) during haze drought conditions derived from multiple linear regression model (*MLRM*). Negative values indicate decrease in CO<sub>2</sub> uptake for 24-hour *NEE* and midday *NEE*, and increase in CO<sub>2</sub> release for nighttime *NEE*. If not otherwise stated, measurement height is 22 m above the surface.**

|                                   | Predictor [ $\mu\text{mol m}^{-2} \text{s}^{-1}$ ] |                        |                     |                               |                               |                        |                            |                      |                     |
|-----------------------------------|----------------------------------------------------|------------------------|---------------------|-------------------------------|-------------------------------|------------------------|----------------------------|----------------------|---------------------|
|                                   | Air temperature                                    | Air temperature (12 m) | Wind speed          | Fraction of diffuse radiation | CO <sub>2</sub> concentration | Vapor pressure deficit | <i>ET/ET<sub>pot</sub></i> | Incoming <i>PAR</i>  | Total               |
| <b>NEE, 24-hour</b>               | 0.55 ( $\pm$ 0.05)                                 | -                      | -0.16 ( $\pm$ 0.07) | -0.17 ( $\pm$ 0.46)           | -0.29 ( $\pm$ 0.003)          | -0.46 ( $\pm$ 0.04)    | -0.46 ( $\pm$ 0.22)        | -                    | -0.99 ( $\pm$ 0.84) |
| <b>NEE, midday</b>                | 1.83 ( $\pm$ 0.02)                                 | -                      | -                   | 2.48 ( $\pm$ 0.20)            | -0.62 ( $\pm$ 0.001)          | -2.74 ( $\pm$ 0.05)    | -0.55 ( $\pm$ 0.70)        | -3.27 ( $\pm$ 0.001) | -2.86 ( $\pm$ 0.97) |
| <b>NEE, nighttime (19-5:30 h)</b> | -2.12 ( $\pm$ 0.08)                                | 0.19 ( $\pm$ 0.06)     | -0.07 ( $\pm$ 0.33) | -                             | -                             | 1.16 ( $\pm$ 0.17)     | 0                          | -                    | -0.84 ( $\pm$ 1.25) |

**Table S6: Effect of meteorological parameters (predictors,  $\pm$  standard error) on net ecosystem CO<sub>2</sub> exchange (NEE) during increased non-haze drought (NHD+) scenario derived from multiple linear regression model (MLRM). Negative values indicate decrease in CO<sub>2</sub> uptake for 24-hour NEE and midday NEE, and increase in CO<sub>2</sub> release for nighttime NEE. If not otherwise stated, measurement height is 22 m above the surface.**

|                                   | Predictor [ $\mu\text{mol m}^{-2} \text{s}^{-1}$ ] |                    |                     |                    |                       |                     |                     |                     |                     |
|-----------------------------------|----------------------------------------------------|--------------------|---------------------|--------------------|-----------------------|---------------------|---------------------|---------------------|---------------------|
|                                   | Air                                                | Air                | Wind                | Fraction of        | CO <sub>2</sub>       | Vapor               | $ET/ET_{pot}$       | Incoming            | Total               |
|                                   | temperature                                        | temperature        | speed               | diffuse            | concentration         | pressure            |                     | PAR                 |                     |
|                                   |                                                    | (12 m)             |                     | radiation          |                       | deficit             |                     |                     |                     |
| <b>NEE, 24-hour</b>               | 2.39 ( $\pm$ 0.02)                                 | -                  | 0.41 ( $\pm$ 0.003) | 0.50 ( $\pm$ 0.13) | 0.18 ( $\pm$ 0.00003) | -0.39 ( $\pm$ 0.01) | -0.84 ( $\pm$ 0.04) | -                   | 2.25 ( $\pm$ 0.17)  |
| <b>NEE, midday</b>                | 7.02 ( $\pm$ 0.16)                                 | -                  | -                   | -2.50 (1.71)       | 0.39 ( $\pm$ 0.001)   | -1.94 ( $\pm$ 0.08) | -0.84 ( $\pm$ 0.17) | 4.40 ( $\pm$ 0.001) | 6.52 ( $\pm$ 1.80)  |
| <b>NEE, nighttime (19-5:30 h)</b> | -8.99 ( $\pm$ 0.13)                                | 6.18 ( $\pm$ 0.08) | 0.15 ( $\pm$ 0.06)  | -                  | -                     | 0.96 ( $\pm$ 0.13)  | 0.10 ( $\pm$ 0.04)  | -                   | -1.59 ( $\pm$ 0.29) |

**Table S7: Effect of meteorological parameters (predictors,  $\pm$  standard error) on net ecosystem CO<sub>2</sub> exchange (NEE) during increased haze drought (HD+) scenario derived from multiple linear regression model (MLRM). Negative values indicate decrease in CO<sub>2</sub> uptake for 24-hour NEE and midday NEE, and increase in CO<sub>2</sub> release for nighttime NEE. If not otherwise stated, measurement height is 22 m above the surface.**

|                                   | Predictor [ $\mu\text{mol m}^{-2} \text{s}^{-1}$ ] |                    |                     |                     |                     |                     |                            |                      |                     |
|-----------------------------------|----------------------------------------------------|--------------------|---------------------|---------------------|---------------------|---------------------|----------------------------|----------------------|---------------------|
|                                   | Air                                                | Air                | Wind                | Fraction of         | CO <sub>2</sub>     | Vapor               | <i>ET/ET<sub>pot</sub></i> | Incoming             | Total               |
|                                   | temperature                                        | temperature        | speed               | diffuse             | concentration       | pressure            |                            | <i>PAR</i>           |                     |
|                                   |                                                    | (12 m)             |                     | radiation           |                     | deficit             |                            |                      |                     |
| <b>NEE, 24-hour</b>               | 2.74 ( $\pm$ 0.13)                                 | -                  | -0.16 ( $\pm$ 0.01) | -0.60 ( $\pm$ 0.28) | -2.46 ( $\pm$ 0.01) | -0.68 ( $\pm$ 0.03) | -0.85 ( $\pm$ 0.19)        | -                    | -2.01 ( $\pm$ 0.38) |
| <b>NEE, midday</b>                | 9.05 ( $\pm$ 0.21)                                 | -                  | -                   | 4.36 ( $\pm$ 0.87)  | -6.80 ( $\pm$ 0.01) | -4.58 ( $\pm$ 0.23) | -0.97 ( $\pm$ 0.68)        | -5.57 ( $\pm$ 0.003) | -4.51 ( $\pm$ 0.16) |
| <b>NEE, nighttime (19-5:30 h)</b> | -9.98 ( $\pm$ 0.76)                                | 5.88 ( $\pm$ 0.36) | -0.07 ( $\pm$ 0.02) | -                   | -                   | 1.54 ( $\pm$ 0.26)  | 0.10 ( $\pm$ 0.06)         | -                    | -2.53 ( $\pm$ 0.10) |
